# Supplementary material for: Abrupt Common Era hydroclimate shifts drive west Greenland ice cap change
Source: Springer Nature journal article supplement (doi:10.1038/s41561-021-00818-w), 2021-09-09
Supplement: 41561_2021_818_MOESM1_ESM.pdf [file 41561_2021_818_MOESM1_ESM.pdf]

---

**Supplementary information**

---

**Abrupt Common Era hydroclimate shifts drive west Greenland ice cap change**

---

In the format provided by the authors and unedited

# Abrupt Common Era hydroclimate shifts drive west Greenland ice cap change

Matthew B. Osman<sup>1,2\*</sup>, Benjamin E. Smith<sup>3</sup>, Luke D. Trusel<sup>4</sup>, Sarah B. Das<sup>5</sup>, Joseph R. McConnell<sup>6</sup>, Nathan Chellman<sup>6</sup>, Monica Arienzo<sup>6</sup>, and Harald Sodemann<sup>7</sup>

<sup>1</sup>Massachusetts Institute of Technology/Woods Hole Oceanographic Institution Joint Program in Oceanography/Applied Ocean Sciences and Engineering, Woods Hole, MA, 02543

<sup>2</sup>Department of Geosciences, University of Arizona, Tucson, AZ, 85721

<sup>3</sup>Applied Physics Laboratory, University of Washington, Seattle, WA, 98105

<sup>4</sup>Department of Geography, Pennsylvania State University, State College, PA, 16802

<sup>5</sup>Geology and Geophysics, Woods Hole Oceanographic Institution, Woods Hole, MA, 02543

<sup>6</sup>Division of Hydrologic Sciences, Desert Research Institute, Reno, 89512

<sup>7</sup>Geophysical Institute, University of Bergen and Bjerknes Centre for Climate Research, Bergen, Norway 5020

\* Email: mattosman@arizona.edu

## Supplementary Material

### *Contents:*

- Section 1. Geodetic measurements
- Section 2. Ice-penetrating radar measurements
- Section 3. Ground-penetrating radar measurements
- Section 4. Final ice core site selection
- Section 5. Nuussuaq ice cap strain inversion
- Table S1. Nuussuaq ice core age constraints
- References

## 29 **1. Geodetic measurements**

30 We generated a digital elevation model for the ice cap using photogrammetric image data from the  
31 Worldview-1 satellite, collected 9 September, 2012. The imagery was converted to a Digital  
32 Elevation Model (DEM; Fig. 2a) using the Ames Stereo Pipeline software package<sup>1</sup>. Spot checks  
33 against field-collected GPS data suggest that the DEM is accurate to within 1-2 m over the ice  
34 sheet.  
35

## 36 **2. Ice-penetrating radar measurements**

37 We conducted a ground-based ice-penetrating radar (IPR) survey on the south face of the ice cap  
38 during April 2014 using a monopulse radar system with 7-MHz loaded-dipole antennas. The  
39 survey followed four flowlines and two contour lines spanning an area of around 1x3 km that  
40 appeared crevasse-free on satellite imagery. Towards the end of the survey, a connector failed on  
41 the radar system, leaving us with data on three out of the four flow lines. Additional data were  
42 collected by NASA's Operation Ice Bridge which overflew the ice cap three times between 2014  
43 and 2016 and measured ice thickness with the MCCORDS radar system. Radargrams from both  
44 systems showed clear bed and surface returns, but no visible internal stratigraphy. On the  
45 radargrams from our IPR survey, and on the level-1b IceBridge data products, we digitized the  
46 surface and bed returns and calculated the ice thickness based on the difference between the two  
47 using a wave velocity of  $168 \text{ m } \mu\text{s}^{-1}$ . Integrating the porosity from density measurements in the  
48 ice core from the SE flank of the ice cap gave an equivalent air column of 11.3 m, which implies  
49 a firn-air correction of 5 m for ice-thickness estimates.

50 We converted the ice-thickness measurements into estimates of the bed elevation using our  
51 surface digital elevation model (Fig. 2a). The measurements reflect a very smooth domed structure  
52 beneath the central part of the ice cap. Because our data distribution was somewhat irregular, and  
53 because the structure of the height measurements appeared very smooth, we interpolated bed-  
54 elevation between our measurements using a second-degree polynomial fit to the bed elevations:  
55  $Z_p = 72.8x + 9.5y - 59.4xy - 20.7x^2 - 33.1y^2$ . Here,  $x$  and  $y$  are offsets (km) relative to  
56  $70.489^\circ\text{N}$  and  $52.263^\circ\text{W}$  (the point we eventually chose as our core location) in the Greenland  
57 polar stereographic projection. This polynomial matches our bed-elevation estimates with a root-  
58 mean-squared error of 1.5 m which is well within the expected error bounds for the data.  
59

## 60 **3. Ground-penetrating radar measurements**

61 The 2014 radar survey team also carried a GSSI ground-penetrating radar (GPR) operating at 400  
62 MHz. We processed the data with a bandpass filter with cutoff frequencies of 150 and 750 MHz.  
63 The data showed strongly disturbed from the surface to the lower limit of the measurements, at  
64 around 17 m depth. We found one layer that appeared to be marginally continuous on a path from  
65 the summit to the east along the ridge, and back along one of the flowlines to the summit. The  
66 depth to this layer varied from around 1.6 m at the summit to around 3.7 m at the eastern edge of  
67 the survey. Other layers are apparently continuous over shorter distances in other parts of the  
68 survey, but they were sufficiently disturbed that we did not feel that picking their depths would  
69 add useful information to the data.  
70

## 71 **4. Final ice core site selection**

72 At the time that we needed to pick a core location, we had a high-resolution photogrammetric  
73 DEM of the ice cap, the 2014 ice-thickness measurements from IPR, and layering measurements  
74 from GPR. At the time, we interpreted the layer in the GPR measurements as an isochrone, which

75 implied that the accumulation at the summit was about half that on the SE flank of the ice cap.  
 76 Under this interpretation, the accumulation gradient was sharpest in within 100 m of the summit,  
 77 and the accumulation rate was relatively constant beyond this. Although we did not have ice-  
 78 thickness measurements on the flowline for which we had GPR thickness measurements, the close  
 79 agreement between the polynomial fit and the bed-elevation measurements suggested that the bed  
 80 elevation should be well constrained at a point around 250 m downhill from the summit. By not  
 81 drilling exactly at the summit, we expected to avoid potential disturbances in the layering caused  
 82 by small-scale orographic accumulation variations, and to avoid some potential disturbances  
 83 caused by divide migration in the past. Our final selected location was 70.489°N, 52.263°W, for  
 84 which we estimated the ice thickness, based on our bed and surface models, to be 153 m, with an  
 85 uncertainty of 5-10 m based on the bandwidth of the ground based IPR and the rise time of the bed  
 86 return in the airborne radar data. The ice-equivalent thickness, equal to the measured thickness  
 87 minus the equivalent air column height calculated from the density profile, is 142 m<sub>ice</sub>.  
 88

## 89 5. Nuussuaq ice cap strain inversion

90 We formed an initial estimate of the age-depth scale for our core based on a thinning function,  
 91  $C(t)$ , that gives the ratio of the ice-equivalent thickness of a layer deposited in year  $t$  to its original  
 92 thickness when it was deposited at the surface, and a time-variable layer thickness,  $\theta_0(t)$ . In this  
 93 model, the thickness of any layer found in the core is:

$$94 \theta_c(t) = C(t)\theta_0(t) . \quad (S1)$$

95  
 96  
 97 The depth for the age-depth scale for time  $t$  is found by adding the thicknesses of all layers with  
 98 ages less than  $t$ . The thinning function  $C(t)$  is estimated based on a one-dimensional flow model  
 99 for a constant accumulation rate, in which the vertical strain rate,  $\dot{\epsilon}(z)$ , at any height  $z$  above the  
 100 ice cap bed  $0 \leq z \leq H$  (where  $H$  is the surface height) is proportional to the horizontal velocity,  
 101  $u(z)$ . If the basal velocity is zero, and if the ice temperature does not vary strongly with depth,  
 102 then integrating Glen's flow law<sup>2-4</sup> from the bed to height  $z$  gives:

$$103 u(z) = u_H \left[ 1 - \left( 1 - \frac{z}{H} \right)^{n+1} \right], \quad (S2)$$

104 where the creep exponent  $n = 3$  is prescribed following convention<sup>2</sup>. If  $\dot{\epsilon}(z)$  is proportional to  
 105  $u(z)$ , then

$$106 \dot{\epsilon}(z) = -\dot{\epsilon}_H \frac{u(z)}{u_H} . \quad (S3)$$

107  
 108 where  $\dot{\epsilon}_H$  and  $u_H$  denote the vertical strain rate and horizontal velocity at the ice cap surface,  
 109 respectively. The integral of the vertical strain rate from the bed to the surface gives the vertical  
 110 velocity,  $w$ , at the surface<sup>2,4</sup>, equal to:

$$111 w_H = -\dot{\epsilon}_H \left( H \frac{n+1}{n+2} \right), \quad (S4)$$

112 or, solving for  $\dot{\epsilon}_H$  gives the surface vertical strain rate:  
 113  
 114  
 115  
 116  
 117  
 118

$$\dot{\epsilon}_H = -\frac{w_H}{H} \frac{n+2}{n+1} . \quad (\text{S5})$$

120

121 This expression is similar to that for the mean strain rate (equal to the accumulation rate divided  
 122 by the ice thickness) but because the strain rate near the bed is small, the surface strain rate must  
 123 be larger than the mean. The final expression for the vertical strain rate as a function of height  
 124 above the bed is then:

125

$$\dot{\epsilon}(z) = \dot{\epsilon}_H \left[ 1 - \left( 1 - \frac{z}{H} \right)^{n+1} \right] . \quad (\text{S6})$$

127

128 The vertical velocity at any depth is found by integrating  $\dot{\epsilon}(z)$  from the bed to  $z$ :

129

$$w(z) = -\dot{\epsilon}_H H \left[ 1 - \frac{1}{n+2} - \left( \mu - \frac{1}{n+2} \mu^{n+2} \right) \right] . \quad (\text{S7})$$

131

132 Here,  $\mu = 1 - \frac{z}{H}$ . An idealized steady-state age-depth scale for time  $t$  can be found by integrating  
 133 the position of a particle as it traverses the vertical-velocity field from the surface at time  $-t$  to  $t$   
 134  $= 0$  using the vertical-velocity depth profile (S7). The thinning function  $C(t)$  is the exponential of  
 135  $\dot{\epsilon}_H$ , integrated as a function of time along a layer's path from  $H$  to its final depth,  $z$ :

136

$$C(t) = \exp \left[ \int_{-t}^0 \dot{\epsilon}(z(t)) dt \right] . \quad (\text{S8})$$

138

139 Age-depth scales calculated using this scheme depend on the initial layer thickness (i.e.,  
 140 accumulation rate) and the total ice thickness. If the accumulation rate varies in time, then during  
 141 the time between a layer's deposition at the surface and its recovery in an ice core, the ice cap  
 142 thickness will change, and the thinning rate will in general be different from that given by S8 for  
 143 constant  $w_H$ . However, as long as the thickness variation over the lifetime of a layer is small, we  
 144 expect that layer thicknesses calculated with S8 will not differ substantially from those of a steady-  
 145 state model with  $w_H$  equal to the temporal mean of the accumulation rate,  $\dot{b}_0$ . Under this  
 146 assumption, we calculate an age-depth scale from S1 using  $C(t)$  from S8 and  $w_H = -\dot{b}_0$  in S5.  
 147 Under this assumption, we expressed the age-depth scale,  $\delta(t)$ , as a linear function of  $\dot{b}(z(t))$  and  
 148 a non-linear function of  $\dot{b}_0$  and the ice cap "reference" thickness,  $H_0$ :

149

$$\delta(t) = \dot{b}_0 \sum_{i=0}^t s_i C(t_i) . \quad (\text{S9})$$

151

152 Here  $s_i$  is a set of scaling values quantifying the ratio between the original annual layer thickness,  
 153  $\dot{b}_i$ , and  $\dot{b}_0$  for each year  $i$  of the model. Age constraint depths specify a few of the estimated 1935  
 154 annual layers in the core, but to calculate  $\delta(t)$  we need to find estimates of  $s_i$  for the remaining  
 155 layers. Alone, (S9) does not allow a unique solution for these quantities for all  $\dot{b}_0$  and  $H$ , so we  
 156 look for a set of solutions that give the least-complex accumulation histories that match the  
 157 measured layer dates to within their estimated age-constrained depth uncertainties ( $\sigma_k$ ). These  
 158 solutions minimize the cost function:

159

$$J = \sum_{k=1}^n \left( \frac{\delta(t_k, \dot{b}_0, H_0) - \delta_{0,k}}{\sigma_k} \right)^2 + \lambda \sum_{i=0}^t (s_i - 1)^2 . \quad (\text{S10})$$

161  
 162 The scalar  $\lambda$  is a weight value that specifies the relative importance of the layer thicknesses and  
 163 the data misfits in determining  $J$ . Minimizing the first term improves the match between  $\delta_t$  at the  
 164  $n$  age-constrained depths ( $\delta_{0,k}$ ), minimizing the second term yields a simpler solution; minimizing  
 165 both at the same time gives solutions that balance between the two, the particulars of the solution  
 166 depending on the choice of  $\lambda$ .

167  
 168 The  $n$  age-constrained depths only provides information about the thickness of groups of layers,  
 169 not on individual layers, so to further simplify the problem, we assume that  $s$  is constant between  
 170 pairs of depth picks, thus specifying a mean accumulation rate for the interval  $t_k$  to  $t_{k+1}$ . With  
 171 this simplification, (S10) becomes:

$$173 \quad J = \sum_{k=1}^n \left( \frac{\delta(t_k, \dot{b}_0, H_0) - \delta_{0,k}}{\sigma_k} \right)^2 + \lambda \sum_{i=0}^k (t_{k+1} - t_k) (s_k - 1)^2. \quad (\text{S11})$$

174  
 175 Here  $s_k$  is the constant scaling value applied to all of the layer thicknesses between two measured  
 176 layer ages. To express this equation as a set of matrix multiplications, we use the notation:

$$178 \quad J = (\mathbf{G}\mathbf{s} - \delta_0)^T \boldsymbol{\Sigma}^{-1} (\mathbf{G}\mathbf{s} - \delta_0) + \lambda (\mathbf{s} - 1)^T \mathbf{W} (\mathbf{s} - 1), \quad (\text{S12})$$

179  
 180 with bolded-capitol denoting a matrix, bolded-lowercase a vector and unbolded-lowercase a scalar.  
 181 Here,

$$182 \quad \mathbf{G} = \begin{bmatrix} g_{11} & 0 & \dots & 0 & \dots & 0 \\ g_{21} & g_{22} & \dots & 0 & \dots & 0 \\ \vdots & \vdots & \ddots & \vdots & \ddots & \vdots \\ g_{k1} & g_{k2} & \dots & g_{kk} & \dots & 0 \\ \vdots & \vdots & \ddots & \vdots & \ddots & \vdots \\ g_{n1} & g_{n2} & \dots & g_{nk} & \dots & g_{nn} \end{bmatrix}, \quad (\text{S13})$$

184 wherein,

$$186 \quad g_k = \dot{b}_0 \int_{t_{k-1}}^{t_k} C(t, \dot{b}_0, H_0) dt, \quad (\text{S14})$$

188  
 189 That is,  $\mathbf{G}$  is a lower-triangular  $n \times n$  matrix comprised of idealized ice equivalent thicknesses  
 190 (predicted ice equivalent thicknesses under some combination of prescribed steady-state  $\dot{b}_0$  and  
 191  $H_0$ ) between the surface and  $n$  age-constrained depths. The  $n \times 1$  vector  $\mathbf{s}$  consists of the  $n$  mean  
 192 accumulation rate scale values for intervals  $t_k$  to  $t_{k+1}$ .  $\boldsymbol{\Sigma}$  is a diagonal matrix consisting of the  $n$   
 193 squared depth uncertainty values ( $\sigma^2$ ). In the second term,  $\mathbf{W}$  is a diagonal matrix consisting of  $\delta_t$   
 194  $= [(t_1 - 0) \dots (t_k - t_{k-1}) \dots (t_n - t_{n-1})]$ .

195  
 196 For a given value of  $\lambda$ ,  $J$  is minimized by  $\mathbf{s}$  for which  $\frac{dJ}{ds} = 0$ ; that is, the least squares solution to  
 197 (S14). We assume that if the error estimates for our layer picks are well prescribed and the errors  
 198 Gaussian normal, the first term of (S12) for the true age-depth relationship will have a  $\chi^2$ -  
 199 distribution with  $n - 1$  degrees of freedom. We solved (S12) for  $\mathbf{s}$  for different values of  $\lambda$ , which

200 gave us a range of  $\chi^2$  values. We identified the  $\mathbf{s}$  that corresponds to  $\chi^2 = n - 1$  to be the locally  
201 optimum model: the simplest model that matches the data to within the specified error tolerances  
202 under prescribed  $\dot{b}_0$  and  $H_0$ .

203

204 We summarize the mapping between data and model in Eq. 1 of the main text as  $T(\mathbf{m}, \dot{b}_0, H_0)$ ,  
205 which is equivalent to  $\mathbf{G}\mathbf{s}$  for  $\mathbf{G}$  evaluated for  $\dot{b}_0$  and  $H_0$ . Likewise,  $\mathbf{m}$  is equivalent to  $\mathbf{s}\dot{b}_0$ .

206

207

208

209  
210  
211

**Table S1:** Age-constraint depths identified for the NU core, with attribution to the event horizon, and parameters used to identify it.

| Year (CE) | Depth (m w. eq.) | Uncertainty ( $1\sigma$ yrs) | Tie attribution                             | Parameter(s) used   | Citation       |
|-----------|------------------|------------------------------|---------------------------------------------|---------------------|----------------|
| 169.5     | 114.63           | 50                           | Volcanic eruption - ?                       | ECM, Cond.          | <sup>5</sup>   |
| 269.5     | 113.83           | 15                           | Volcanic eruption - ?                       | ECM, S, Cond.       | <sup>5,6</sup> |
| 281.5     | 113.62           | 10                           | Volcanic eruption - ?                       | ECM, Cond.          | <sup>5</sup>   |
| 424.5     | 112              | 5                            | Volcanic eruption - ?                       | ECM, S, Cond.       | <sup>5,6</sup> |
| 536.5     | 110.8            | 5                            | Volcanic eruption - El Chichon, Mexico      | ECM, Cond., S, Pb   | <sup>5,6</sup> |
| 574.5     | 110.37           | 5                            | Volcanic eruption - El Salvador             | Cond., S, Pb        | <sup>5</sup>   |
| 626.5     | 109.77           | 5                            | Volcanic eruption - ?                       | ECM, Cond., S, Pb   | <sup>5</sup>   |
| 682.5     | 108.97           | 5                            | Volcanic eruption - Jombolok, Central Asia  | ECM, Cond., S, Pb   | <sup>5</sup>   |
| 750.5     | 107.59           | 2                            | Volcanic eruption - ?                       | S, Cond., Part.     | <sup>5</sup>   |
| 777.5     | 106.91           | 3                            | Pb - step function                          | Pb                  | <sup>6</sup>   |
| 853.5     | 105.45           | 1                            | Volcanic eruption - ?                       | Pb                  | <sup>5</sup>   |
| 879.5     | 104.93           | 2                            | Volcanic eruption - ?                       | S                   | <sup>5</sup>   |
| 903.5     | 104.41           | 1                            | Volcanic eruption - ?                       | S                   | <sup>5</sup>   |
| 940.5     | 103.51           | 1                            | Volcanic eruption - Eldgjá, Iceland         | S, Pb, Cond.        | <sup>5</sup>   |
| 977.5     | 102.51           | 2                            | Volcanic eruption(s) - ?                    | S, Pb               | <sup>5,6</sup> |
| 1020.5    | 101.41           | 2                            | Volcanic eruption - ?                       | S, Pb, Cond.        | <sup>5</sup>   |
| 1028.5    | 101.23           | 1                            | Volcanic eruption - ?                       | Part., S, Pb, Cond. | <sup>5</sup>   |
| 1110.5    | 98.81            | 5                            | Volcanic eruption - Mt. Asama, Japan        | S                   | <sup>5,6</sup> |
| 1145.5    | 97.815           | 3                            | Pb - step function                          | Pb                  | <sup>6</sup>   |
| 1159.5    | 97.27            | 3                            | Pb - step function                          | Pb                  | <sup>6</sup>   |
| 1172.5    | 96.69            | 3                            | Volcanic eruption - ?                       | S                   | <sup>5</sup>   |
| 1182.5    | 96.33            | 3                            | Volcanic eruption - ?                       | S, Pb, Cond.        | <sup>5</sup>   |
| 1192.5    | 96.01            | 3                            | Volcanic eruption - ?                       | S, (Pb), Cond.      | <sup>5</sup>   |
| 1201.5    | 95.75            | 2                            | Volcanic eruption - ?                       | S, Pb, Cond.        | <sup>5</sup>   |
| 1222.5    | 94.81            | 2                            | Pb-depositional horizon                     | Pb                  | <sup>6</sup>   |
| 1231.5    | 94.53            | 3                            | Volcanic eruption - Lipari, Italy           | S, Pb               | <sup>5,6</sup> |
| 1259.5    | 93.353           | 3                            | Volcanic eruption - Samalas, Indonesia      | S                   | <sup>5</sup>   |
| 1288.5    | 92.15            | 5                            | Volcanic eruption - ?                       | S, Pb               | <sup>5,6</sup> |
| 1330.5    | 89.938           | 2                            | Volcanic eruption - Mt. Etna, Italy         | S, Pb, Cond.        | <sup>5</sup>   |
| 1345.5    | 89.09            | 2                            | Volcanic eruption - Popocatepetl, Mexico    | S, Pb, Cond.        | <sup>5</sup>   |
| 1358.5    | 88.51            | 3                            | Volcanic eruption - ?                       | Pb, S               | <sup>5,6</sup> |
| 1391.5    | 86.71            | 3                            | Volcanic eruption - Hekla, Iceland          | Pb, S               | <sup>5,6</sup> |
| 1442.5    | 84.19            | 3                            | Volcanic eruption - ?                       | S                   | <sup>6</sup>   |
| 1477.5    | 82.15            | 2                            | Volcanic eruption - Sangeang Api, Indonesia | Pb, S, Cond.        | <sup>5</sup>   |
| 1502.5    | 80.85            | 3                            | Volcanic eruption - ?                       | S, Cond.            | <sup>5</sup>   |
| 1512.5    | 80.05            | 3                            | Volcanic eruption - ?                       | S, Pb, Cond.        | <sup>5</sup>   |
| 1537.5    | 78.43            | 3                            | Volcanic eruption - ?                       | S, Cond.            | <sup>5</sup>   |
| 1554.5    | 76.85            | 3                            | Volcanic eruption - ?                       | S, Pb, Cond.        | <sup>5</sup>   |

|         |        |     |                                                 |                            |     |
|---------|--------|-----|-------------------------------------------------|----------------------------|-----|
| 1569.5  | 75.73  | 3   | Volcanic eruption -<br>Tambora,<br>Indonesia(?) | Pb, S                      | 5,6 |
| 1585.5  | 74.31  | 3   | Volcanic eruption -<br>(?)                      | S, Pb, Cond.               | 5   |
| 1601.5  | 72.838 | 1   | Volcanic eruption -<br>Huaynaputina, Peru       | S, Pb, Part.,<br>Cond.     | 5   |
| 1642.5  | 69.21  | 1   | Volcanic eruption -<br>Parker, Phillipines      | S, Pb, Part.,<br>Cond.     | 5   |
| 1667.5  | 67.01  | 1   | Volcanic eruption -<br>Mt Tarumae, Japan        | S, Pb, Part.,<br>Cond.     | 5   |
| 1696.5  | 64.35  | 1.5 | Volcanic eruption -<br>Sabancaya, Peru          | S, Pb, Part.,<br>Cond.     | 5   |
| 1739.5  | 59.95  | 1   | Volcanic eruption -<br>Mt. Tarumae, Japan       | S, Pb, Part.,<br>Cond.     | 5   |
| 1766.5  | 56.65  | 1   | Volcanic eruption -<br>Hekla, Iceland           | S, Pb, Part.,<br>Cond.     | 5   |
| 1783.5  | 54.43  | 0.5 | Volcanic eruption -<br>Laki, Iceland            | S, Pb, Ti, Part.,<br>Cond. | 5,7 |
| 1816.5  | 48.634 | 1   | Volcanic eruption -<br>Tambora, Indonesia       | S, Pb, Ti, Part.,<br>Cond. | 5,7 |
| 1836.5  | 45.47  | 1   | Volcanic eruption -<br>Cosigüina, Nicaragua     | S, Pb, Ti, Part.,<br>Cond. | 5,7 |
| 1863.5  | 41.19  | 1   | Volcanic eruption -<br>Makian, Indonesia        | S, Pb, Ti, Part.,<br>Cond. | 5,7 |
| 1873.5  | 39.27  | 0.5 | Volcanic eruption -<br>Grímsvötn, Iceland       | S, Pb, Ti, Part.,<br>Cond. | 5,7 |
| 1884.5  | 37.01  | 1   | Volcanic eruption -<br>Krakatoa, Indonesia      | S, Pb, Ti, Part.,<br>Cond. | 5,7 |
| 1912.5  | 30.67  | 1   | Volcanic eruption -<br>Novarupta, AK            | S, Pb, Ti, Part.,<br>Cond. | 5,7 |
| 1955.5  | 19.95  | 1   | Radiogenic (bomb<br>horizon)                    | <sup>239</sup> Pu          | 8   |
| 1962.5  | 17.81  | 1   | Radiogenic (bomb<br>horizon)                    | <sup>239</sup> Pu          | 8   |
| 2015.42 | 0      | 0   | Core top                                        | N/a                        | ~   |

213 **References**

214  
215  
216  
217  
218  
219  
220  
221  
222  
223  
224  
225  
226  
227  
228  
229  
230  
231  
232

1. Shean, D. E. *et al.* An automated, open-source pipeline for mass production of digital elevation models (DEMs) from very-high-resolution commercial stereo satellite imagery. *ISPRS J. Photogramm. Remote Sens.* **116**, 101–117 (2016).
2. Cuffey, K. & Paterson, W. *The Physics of Glaciers, Fourth Edition.* (Academic Press, 2010).
3. Nye, J. F. Correction Factor for Accumulation Measured by the Thickness of the Annual Layers in an Ice Sheet. *J. Glaciol.* **4**, 785–788 (1963).
4. Dansgaard, W. & Johnsen, S. J. A Flow Model and a Time Scale for the Ice Core from Camp Century, Greenland. *J. Glaciol.* **8**, 215–223 (1969).
5. Sigl, M. *et al.* Timing and climate forcing of volcanic eruptions for the past 2,500 years. *Nature* **523**, 543 (2015).
6. McConnell, J. R. *et al.* Pervasive Arctic lead pollution suggests substantial growth in medieval silver production modulated by plague, climate, and conflict. *Proc. Natl. Acad. Sci.* **116**, 14910 LP – 14915 (2019).
7. McConnell, J. R. & Edwards, R. Coal burning leaves toxic heavy metal legacy in the Arctic. *Proc. Natl. Acad. Sci.* **105**, 12140 LP – 12144 (2008).
8. Arienzo, M. M. *et al.* A Method for Continuous <sup>239</sup>Pu Determinations in Arctic and Antarctic Ice Cores. *Environ. Sci. Technol.* **50**, 7066–7073 (2016).
